# Supplementary material for: Synthesis of coral-like gold nanocrystals with the glutamic acid–cysteine–glycine–glutamic acid–cysteine–glycine hexapeptide for the electrochemical detection of α-amanitin in urine
Source: Royal Society of Chemistry journal article supplement (doi:10.1039/d3nj00966a), 2023-01-01
Supplement: d3nj00966a1.pdf [file d3nj00966a1.pdf]

## Electronic Supporting Information (ESI)

# Synthesis of coral-like gold nanocrystal with glutamic acid-cysteine-glycine-glutamic acid-cysteine-glycine hexapeptide for electrochemical detection of $\alpha$ -amanitin in urine

Li Ruiyi, Zhu Qiyue, Sun Xiulan, Xu Pengwu and Li Zaijun\*

*School of Chemical and Material Engineering, School of Life Sciences and Health Engineering, and School of Food Science and Technology, Jiangnan University, Wuxi 214122, China*

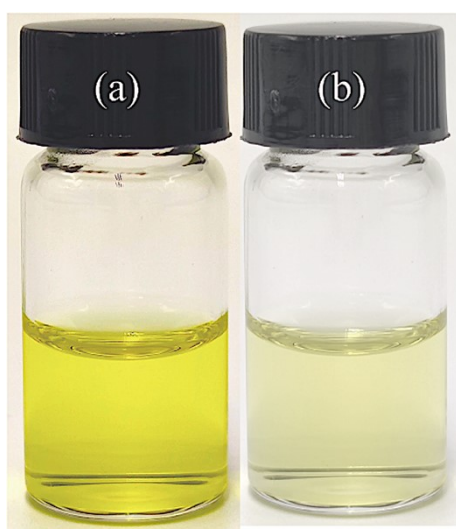

**Fig. s1** Optical photographs of the  $\text{HAuCl}_4$  solution before (a) and after added a mixed CTAC with KBr and KI (b)

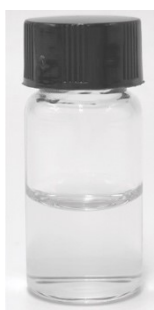

**Fig. s2** Optical photograph of a mixed solution composing of  $\text{HAuCl}_4$ , CTAC, KBr and KI after added ascorbic acid solution for 2 min

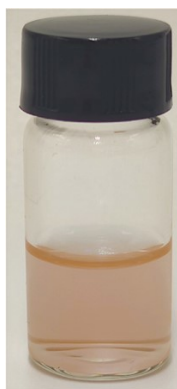

**Fig. s3** Optical photograph of gold seed solution

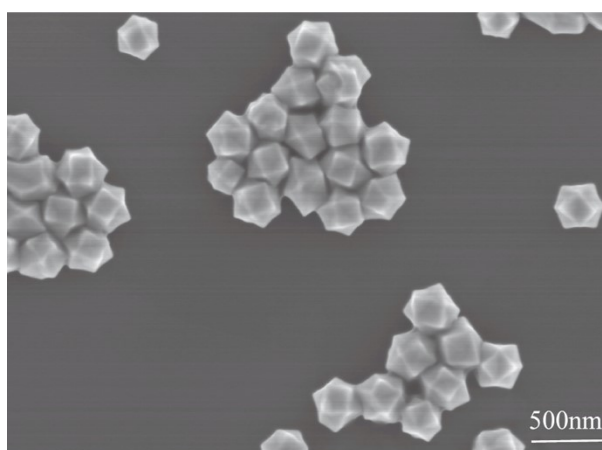

**Fig. s4** SEM image of gold seeds

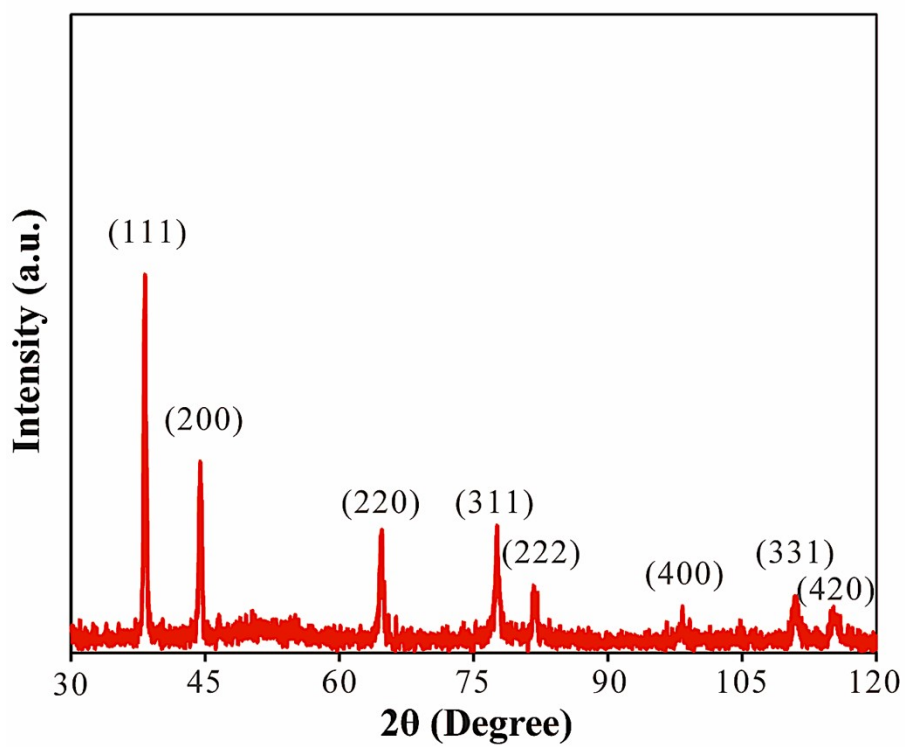

**Fig. s5** XRD pattern of gold seeds

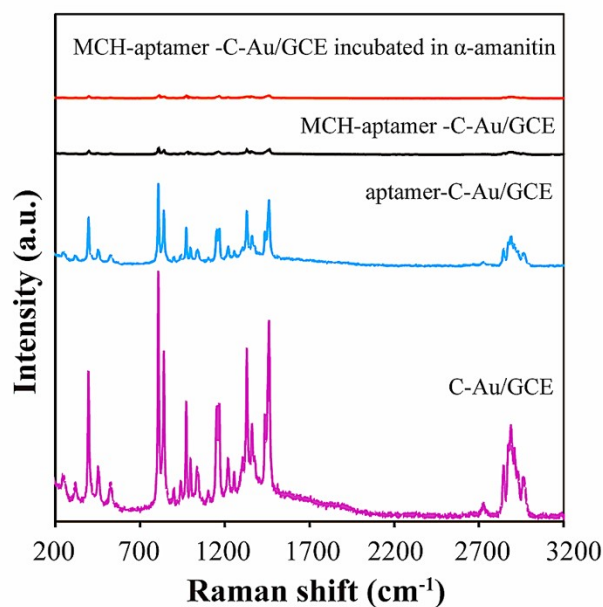

Fig. s6 Raman spectra of rhodamine 6G on different electrodes

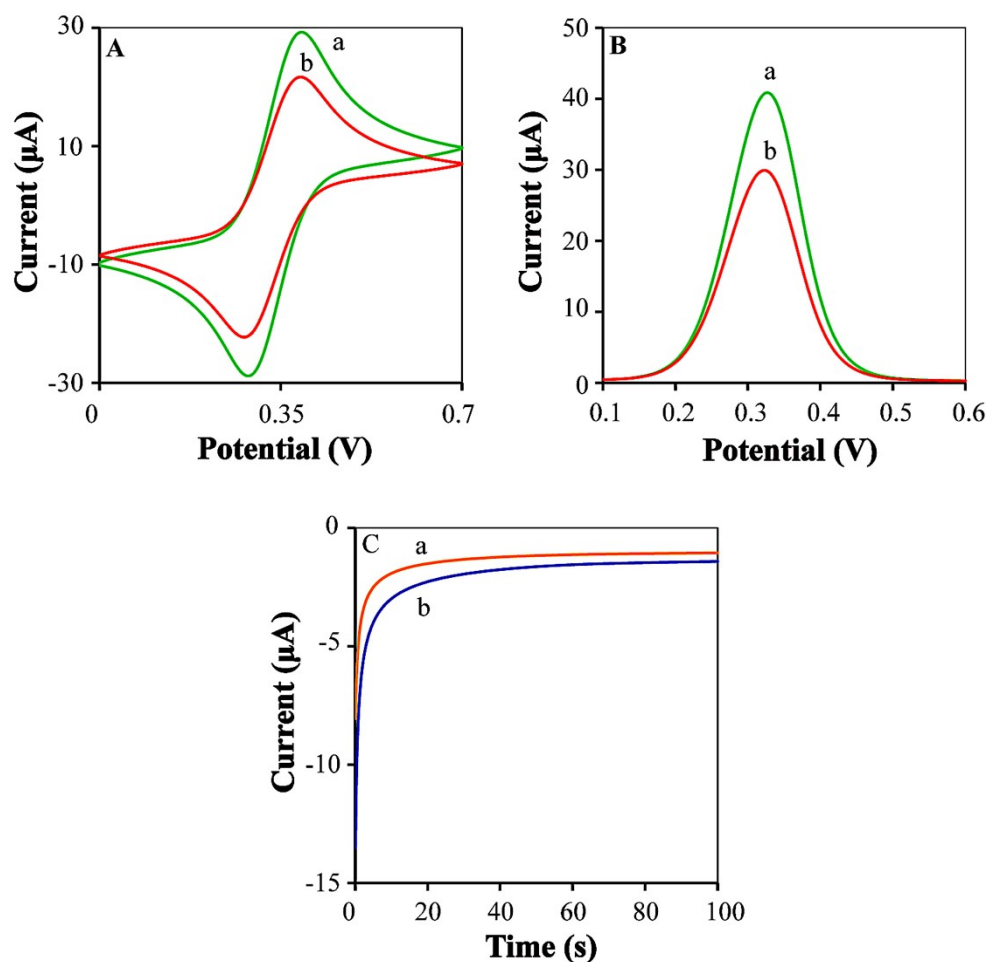

Fig. s7 CV (A), DPV (B) and i-t curves (C) in 1 mM  $K_4Fe(CN)_6$  in the PBS of pH 7.0 of the proposed aptasensor incubated for 60 min in the sample solution (a) and the spiked sample solution by 40 fM  $\alpha$ -amanitin (b)

**Table s1** The ratios (I(f)) of XRD peak intensity to the strongest peak intensity for different tantalum oxides

|   | 2-Theta | h k l | Au NP | TO-Au | C-Au  |
|---|---------|-------|-------|-------|-------|
| 1 | 38.2°   | 111   | 1     | 1     | 1     |
| 2 | 44.4°   | 200   | 0.571 | 0.502 | 0.556 |
| 3 | 64.6°   | 220   | 0.200 | 0.301 | 0.559 |
| 4 | 77.5°   | 311   | 0.198 | 0.340 | 0.578 |
| 5 | 81.7°   | 222   | 0.08  | 0.102 | 0.400 |
| 6 | 98.1°   | 400   | 0.02  | 0.120 | 0.222 |
| 7 | 110.8°  | 311   | 0.003 | 0.160 | 0.267 |
| 8 | 115.3°  | 420   | 0.002 | 0.136 | 0.204 |
